# Supplementary material for: Nanopattern surface improves cultured human myotube maturation
Source: PubMed Central journal article supplement (PMC8097894; doi:10.1186/s13395-021-00268-3), 2021-05-05

Supplemental Figure 1

A

Pax7/DAPI

Pax7/MyoD

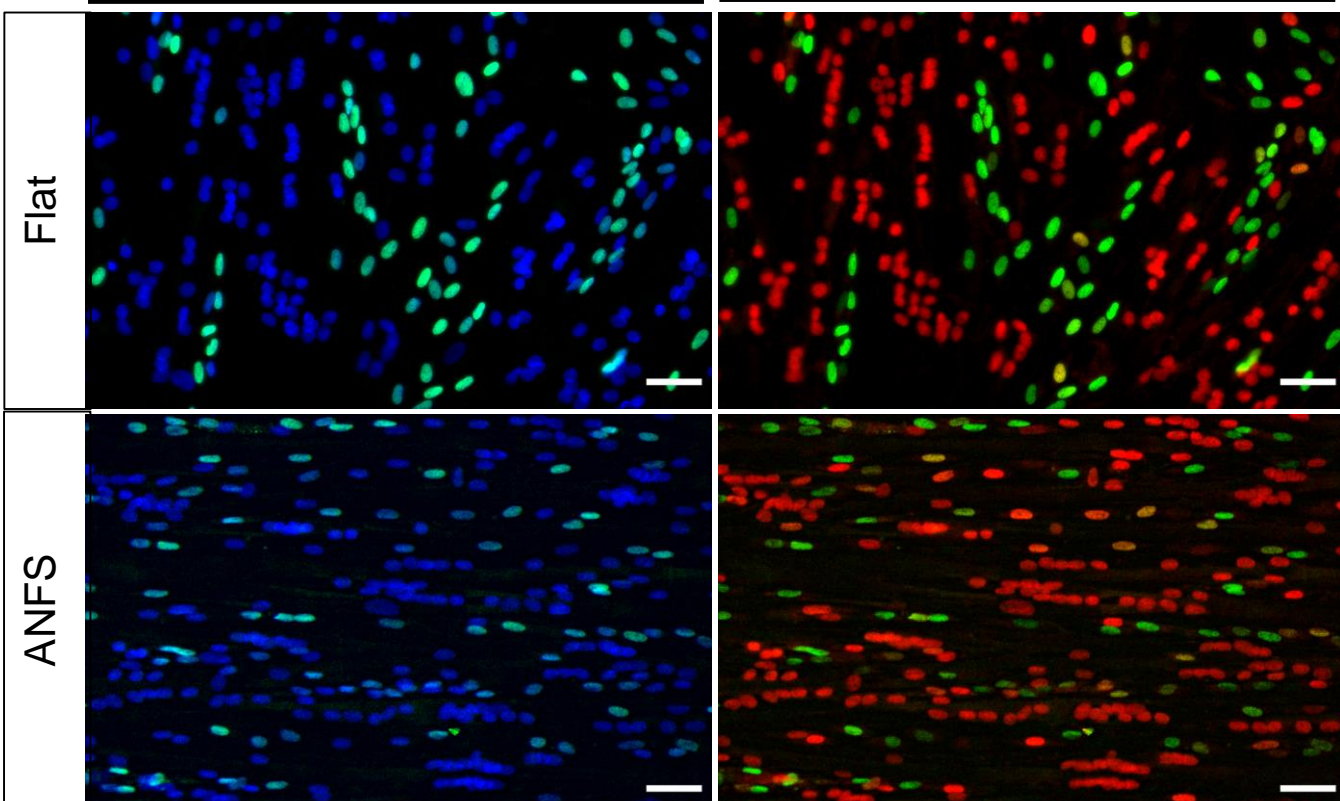

B

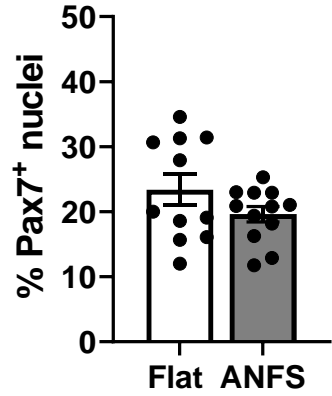

C

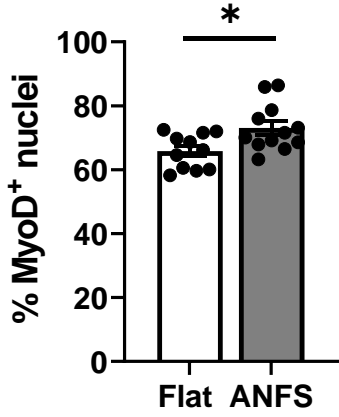

# Supplemental Figure 2

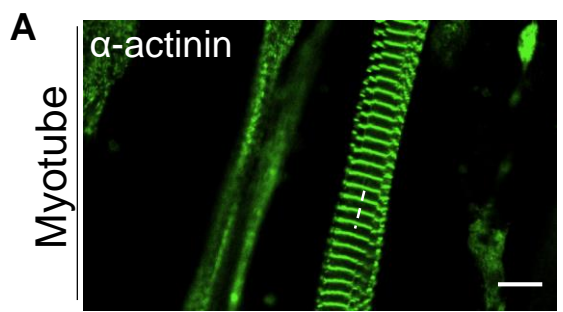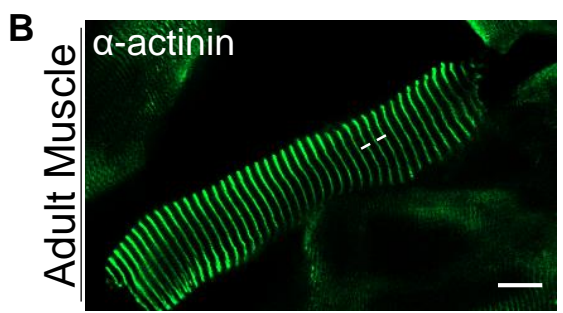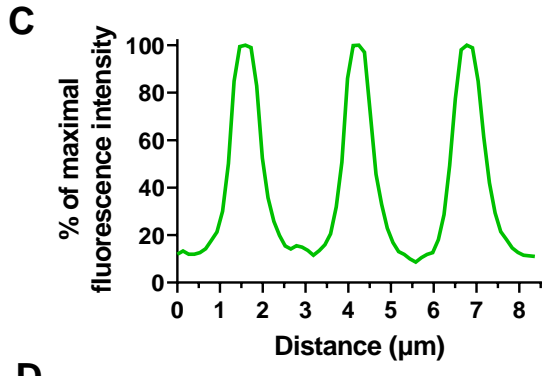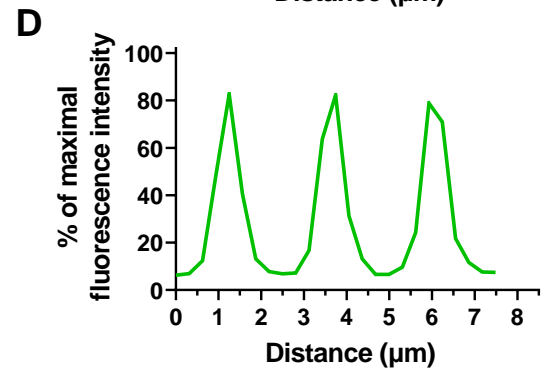

Supplemental Figure 3

A

$\alpha$ -actinin/ $\alpha$ -BTX/DAPI

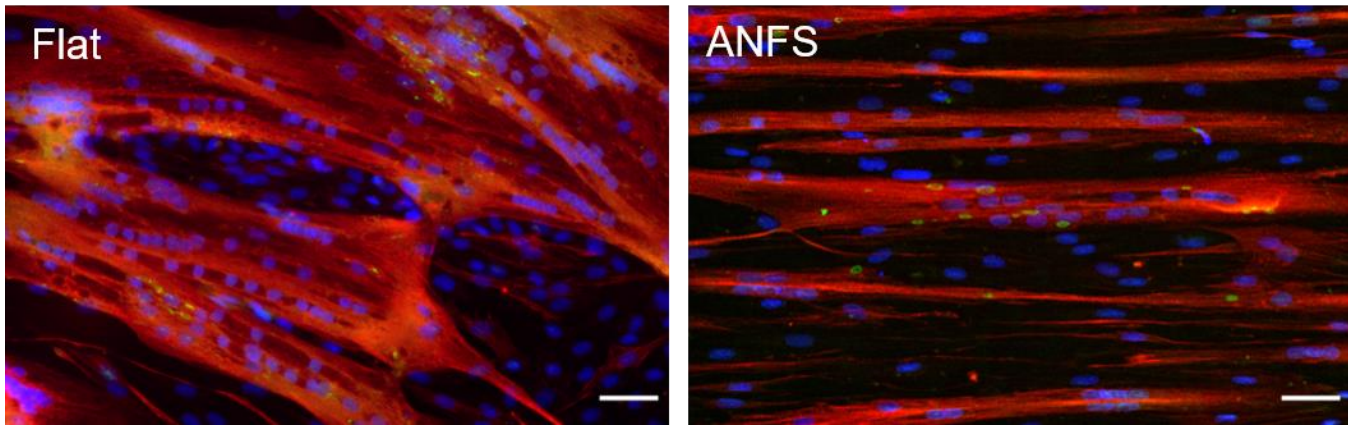

B

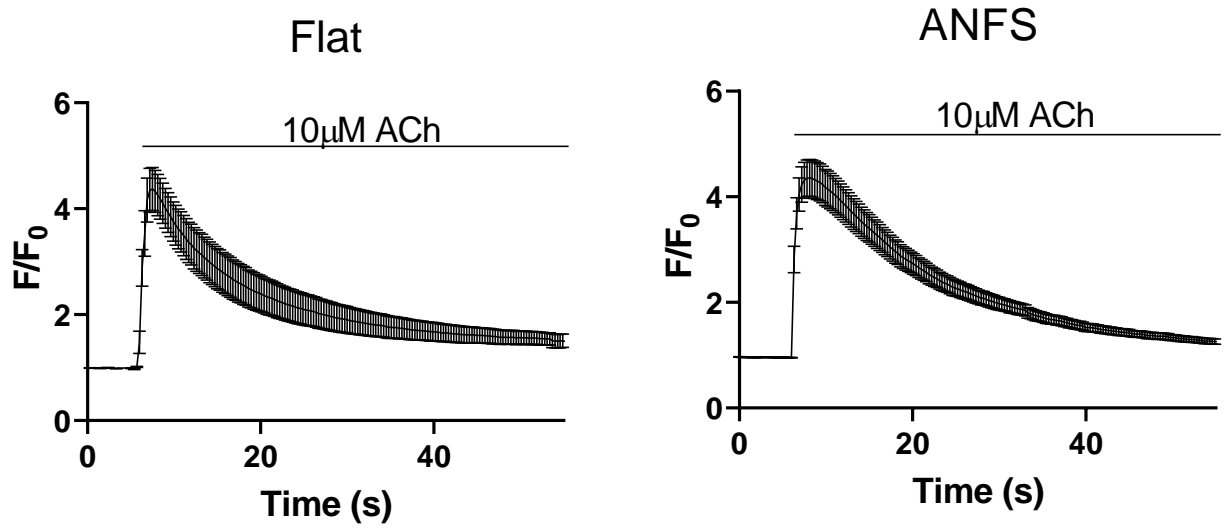

C

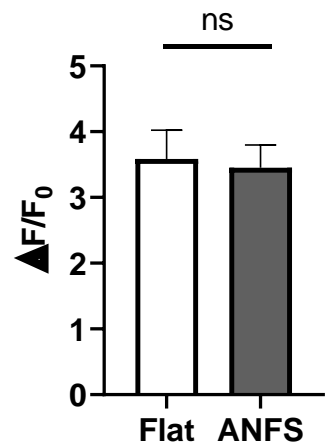

D

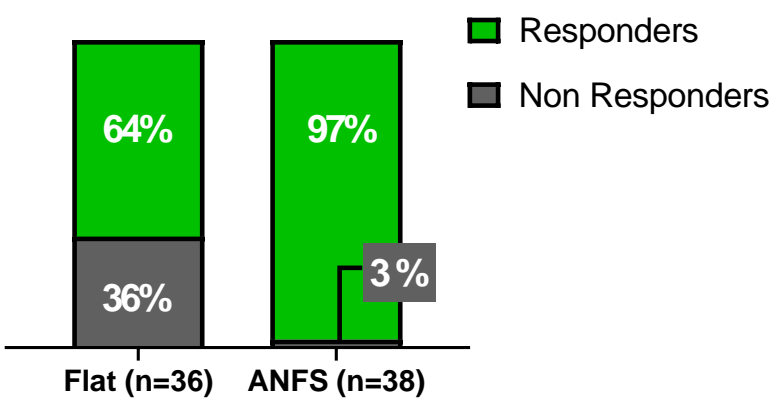

Supplement: 13395_2021_268_MOESM2_ESM.pdf [file 13395_2021_268_MOESM2_ESM.pdf]
